# Supplementary material
Source: Springer Nature journal article supplement (https://www.springermedizin.de/resource/supplementary/12889_2012_4265_MOESM2_ESM.pdf/9491512)
Supplement: MOESM2 [file 9491512]

Identification

307 records identified through database searching  
Bangladesh-36; India-191; Nepal-23  
Pakistan-39; Sri Lanka-18

2 additional records identified through other sources

Screening

298 records after duplicated removed

298 records screened

220 records excluded

Eligibility

78 full text articles assessed for eligibility

31 full text articles excluded

Included

47 studies included in qualitative synthesis

Studies on,  
Prevalence-31; Trends-9  
Urban/rural-10; Risk factors-18
